# Supplementary material for: Synthesis of polymethylene-b-poly(vinyl acetate) block copolymer via visible light induced radical polymerization and its application
Source: Royal Society of Chemistry journal article supplement (doi:10.1039/c7ra06908a), 2017-01-01

Fig. s1  $^1\text{H}$  NMR spectrum of PM-I in  $\text{CDCl}_3$

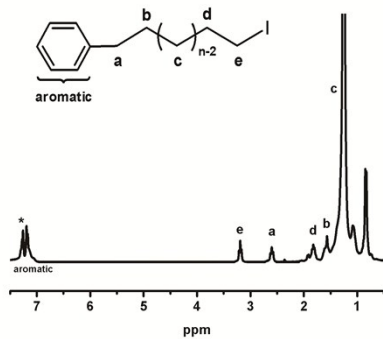

Figure. s2  $^1\text{H}$  NMR spectrum of PM-I in  $\text{C}_6\text{D}_4\text{Cl}_2$

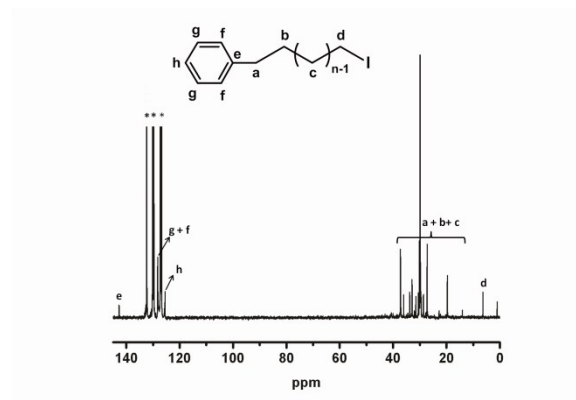

Figure. s3 PM-I-GPC-distribution

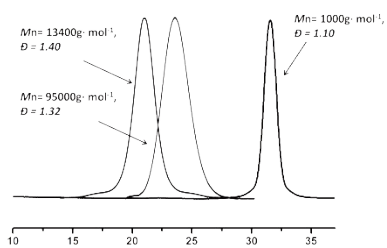

Supplement: c7ra06908a1.pdf [file c7ra06908a1.pdf]
